# Supplementary material
Source: Research Square preprint supplement (doi:10.21203/rs.3.rs-9418759/v1)
Supplement: Supplementary file 2 [file 6bf727bc1f0701a0e9daf87f.docx]

**Supplementary file 3. Draft Principles of Engagement**

The principles of engagement below were drafted by the research team following a systematic review and focus groups on the participation of Black women in health research. These draft principles of engagement were then voted on, modified and refined during a series of consensus workshops. The final principles of engagement can be found in Box 1.

1. **Build Trust Through Relationships and Respect**

- Draw upon existing relationships with trusted NHS and non-NHS maternity care providers in different healthcare settings. Work with them to provide information to women about the importance of research*.*
- Create a positive environment and reduce pressures by considering the timing, tone and turf of the conversation.
- Be patient and respectful in earning/rebuilding trust*,* this can strengthen trust over time. Actively work to earn, as opposed to assume, trust.

1. **Strive for Cultural Sensitivity**

- Ensure RDTs receive formal training in inclusive research practices, ethical practices and cultural competency.
- Avoid treating Black women as a homogenous group; respect individual identities and experiences.
- Be present in communities before initiating research; visibility builds credibility and can also support cultural competency.

1. **Communicate Clearly**

- Let women know that there are active research studies being undertaken in their place of care and that they might be approached to take part during their maternity journey. This can be via posters, the hospital website or in-person.
- When recruiting for specific studies, provide information well in advance to allow time for reflection and decision-making.
- Address language barriers proactively. Talk to the study team about creating recruitment materials that are clear, accessible and appropriate for the local population. Ensure interpreter services are accurate and culturally competent and make use of diversity and language skills within the wider healthcare team.

1. **Empower Safe and Autonomous Decision-Making**

- Support health and research literacy to empower women to make informed choices without pressure or coercion.
- Recognise and respect the influence of family, friends, and community in decision-making.
- Avoid assumptions about motivations; allow space for personal reflection and knowledge seeking.

1. **Be Flexible and Creative in Recruitment**

- Adapt recruitment strategies to meet women where they are—physically, emotionally, and culturally.
- Collaborate with trusted community organisations to support recruitment and engagement.
- Consider convenience and logistical barriers as central to engagement and offer flexible participation options where possible.

1. **Acknowledge and Address Mistrust**

- Be clear and transparent about the purpose, risks, and benefits of research.
- Use examples and testimonials to show how research leads to real-world positive change.
- Directly open discussion and acknowledge any fears, for example relating to data misuse and confidentiality breaches.

1. **Value Women’s Contributions**

- Recognise participation as a meaningful contribution to improving care.
- Offer appropriate incentives that reflect participants’ time and effort, as well as highlighting the wide range of non-financial benefits they could experience if they take part.
- Emphasise the important role of Black women in shaping research.
