# Supplementary material
Source: Research Square preprint supplement (doi:10.21203/rs.3.rs-9418759/v1)
Supplement: Supplementary file 3 [file 7dda83e7bf70348b2bd1399d.docx]

**Supplementary file 4. Results of Consensus Workshops**

Consensus workshop members were asked to score the principles of engagement based on the following question: How important do you think each Principle of Engagement is to support research delivery teams to approach and engage Black women in maternal and neonatal healthcare research?

Scoring system: 1 – Not at all important, 2, 3, 4, 5 – Neutral, 6, 7, 8, 9 – Extremely important

| First vote (original PoE, consensus workshop 1) | | | | | | | |
| --- | --- | --- | --- | --- | --- | --- | --- |
| Vote | **1. Build Trust Through Relationships and Respect** | **2. Strive for Cultural Sensitivity** | **3. Communicate Clearly** | **4. Empower Safe and Autonomous Decision-Making** | **5. Be Flexible and Creative in Recruitment** | **6. Acknowledge and Address Mistrust** | **7. Value Women’s Contributions** |
| 1 | 9 - Extremely important | 9 - Extremely important | 9 - Extremely important | 8 | 7 | 9 - Extremely important | 6 |
| 2 | 9 - Extremely important | 9 - Extremely important | 9 - Extremely important | 7 | 9 - Extremely important | 8 | 8 |
| 3 | 9 - Extremely important | 9 - Extremely important | 9 - Extremely important | 8 | 9 - Extremely important | 9 - Extremely important | 9 - Extremely important |
| 4 | 7 | 8 | 9 - Extremely important | 8 | 9 - Extremely important | 9 - Extremely important | 8 |
| 5 | 9 - Extremely important | 8 | 9 - Extremely important | 8 | 9 - Extremely important | 9 - Extremely important | 9 - Extremely important |
| 6 | 9 - Extremely important | 9 - Extremely important | 9 - Extremely important | 9 - Extremely important | 9 - Extremely important | 9 - Extremely important | 9 - Extremely important |
| 7 | 9 - Extremely important | 9 - Extremely important | 8 | 8 | 9 - Extremely important | 9 - Extremely important | 8 |
| 8 | 9 - Extremely important | 9 - Extremely important | 9 - Extremely important | 9 - Extremely important | 7 | 8 | 9 - Extremely important |
| 9 | 9 - Extremely important | 7 | 8 | 8 | 7 | 7 | 7 |
| 10 | 9 - Extremely important | 2 | 9 - Extremely important | 7 | 5 - Neutral | 8 | 7 |
| 11 | 5 - Neutral | 7 | 9 - Extremely important | 9 - Extremely important | 7 | 7 | 9 - Extremely important |
| 12 | 6 | 4 | 6 | 7 | 6 | 8 | 8 |
| 13 | 9 - Extremely important | 9 - Extremely important | 9 - Extremely important | 9 - Extremely important | 9 - Extremely important | 9 - Extremely important | 9 - Extremely important |
| 14 | 9 - Extremely important | 9 - Extremely important | 9 - Extremely important | 9 - Extremely important | 9 - Extremely important | 9 - Extremely important | 9 - Extremely important |
| 15 | 9 - Extremely important | 9 - Extremely important | 8 | 8 | 7 | 9 - Extremely important | 9 - Extremely important |
| 16 | 7 | 7 | 7 | 8 | 9 - Extremely important | 9 - Extremely important | 9 - Extremely important |
| 17 | 5 - Neutral | 9 - Extremely important | 9 - Extremely important | 5 - Neutral | 6 | 5 - Neutral | 8 |
| 18 | 9 - Extremely important | 9 - Extremely important | 9 - Extremely important | 9 - Extremely important | 9 - Extremely important | 9 - Extremely important | 9 - Extremely important |
| Result | **84% important** | **90% important** | **94% important** | **95% important** | **84% important** | **95% important** | **95% important** |

| Second vote (original PoE, consensus workshops 2 & 3) | | | | | | | |
| --- | --- | --- | --- | --- | --- | --- | --- |
| Vote | **1. Build Trust Through Relationships and Respect** | **2. Strive for Cultural Sensitivity** | **3. Communicate Clearly** | **4. Empower Safe and Autonomous Decision-Making** | **5. Be Flexible and Creative in Recruitment** | **6. Acknowledge and Address Mistrust** | **7. Value Women’s Contributions** |
| 1 | 8 | 9 - Extremely important | 9 - Extremely important | 2 | 9 - Extremely important | 9 - Extremely important | 8 |
| 2 | 9 - Extremely important | 8 | 9 - Extremely important | 9 - Extremely important | 6 | 9 - Extremely important | 9 - Extremely important |
| 3 | 9 - Extremely important | 8 | 7 | 7 | 8 | 9 - Extremely important | 8 |
| 4 | 9 - Extremely important | 9 - Extremely important | 9 - Extremely important | 7 | 7 | 9 - Extremely important | 8 |
| 5 | 7 | 9 - Extremely important | 9 - Extremely important | 8 | 8 | 9 - Extremely important | 8 |
| 6 | 9 - Extremely important | 9 - Extremely important | 9 - Extremely important | 9 - Extremely important | 9 - Extremely important | 9 - Extremely important | 8 |
| 7 | 8 | 8 | 7 | 9 - Extremely important | 9 - Extremely important | 9 - Extremely important | 9 - Extremely important |
| 8 | 9 - Extremely important | 8 | 9 - Extremely important | 8 | 8 | 7 | 8 |
| 9 | 9 - Extremely important | 9 - Extremely important | 9 - Extremely important | 8 | 7 | 9 - Extremely important | 8 |
| 10 | 9 - Extremely important | 9 - Extremely important | 7 | 9 - Extremely important | 9 - Extremely important | 9 - Extremely important | 8 |
| 11 | 9 - Extremely important | 9 - Extremely important | 9 - Extremely important | 2 | 9 - Extremely important | 9 - Extremely important | 9 - Extremely important |
| 12 | 8 | 9 - Extremely important | 9 - Extremely important | 8 | 7 | 9 - Extremely important | 7 |
| 13 | 9 - Extremely important | 8 | 9 - Extremely important | 9 - Extremely important | 8 | 9 - Extremely important | 9 - Extremely important |
| 14 | 9 - Extremely important | 6 | 9 - Extremely important | 9 - Extremely important | 7 | 9 - Extremely important | 9 - Extremely important |
| 15 | 9 - Extremely important | 9 - Extremely important | 9 - Extremely important | 9 - Extremely important | - | 9 - Extremely important | 8 |
| 16 | 9 - Extremely important | 8 | 9 - Extremely important | 8 | - | 9 - Extremely important | - |
| 17 | 9 - Extremely important | - | 7 | 7 | - | 9 - Extremely important | - |
| 18 | 7 | - | - | - | - | 9 - Extremely important | - |
| Result | **100% important** | **93.75 % important** | **100% important** | **88.2% important** | **92.85% important** | **100% important** | **100% important** |

| Third vote (refined PoE) | | | | | | | | |
| --- | --- | --- | --- | --- | --- | --- | --- | --- |
| Vote | **1. Build Trust Through Relationships and Respect** | **2. Strive for Cultural Sensitivity** | **3. Communicate Clearly with Black Women** | **4. Empower Informed Choice and Decision-Making** | **5. Be Flexible and Creative in Recruitment** | **6. Actively Acknowledge and Address Mistrust** | **7. Openly Value Women’s Contributions to Healthcare Research** | **8. Promote Transparent and Accountable Research Practice** |
| 1 | 9 - Extremely important | 9 - Extremely important | 9 - Extremely important | 9 - Extremely important | 9 - Extremely important | 9 - Extremely important | 9 - Extremely important | 9 - Extremely important |
| 2 | 8 | 9 - Extremely important | 9 - Extremely important | 8 | 9 - Extremely important | 8 | 9 - Extremely important | 7 |
| 3 | 9 - Extremely important | 9 - Extremely important | 9 - Extremely important | 8 | 8 | 8 | 8 | 8 |
| 4 | 8 | 9 - Extremely important | 9 - Extremely important | 9 - Extremely important | 9 - Extremely important | 9 - Extremely important | 9 - Extremely important | 9 - Extremely important |
| 5 | 9 - Extremely important | 9 - Extremely important | 9 - Extremely important | 9 - Extremely important | 9 - Extremely important | 9 - Extremely important | 9 - Extremely important | 9 - Extremely important |
| 6 | 9 - Extremely important | 9 - Extremely important | 9 - Extremely important | 9 - Extremely important | 9 - Extremely important | 9 - Extremely important | 9 - Extremely important | 9 - Extremely important |
| 7 | 9 - Extremely important | 9 - Extremely important | 9 - Extremely important | 7 | 7 | 9 - Extremely important | 9 - Extremely important | 9 - Extremely important |
| 8 | 9 - Extremely important | 8 | 8 | 7 | 9 - Extremely important | 9 - Extremely important | 8 | 9 - Extremely important |
| 9 | 9 - Extremely important | 9 - Extremely important | 9 - Extremely important | 9 - Extremely important | 9 - Extremely important | 9 - Extremely important | 9 - Extremely important | 9 - Extremely important |
| 10 | 9 - Extremely important | 8 | 9 - Extremely important | 9 - Extremely important | 7 | 7 | 8 | 7 |
| 11 | 9 - Extremely important | 9 - Extremely important | 9 - Extremely important | 9 - Extremely important | 9 - Extremely important | 9 - Extremely important | 9 - Extremely important | 9 - Extremely important |
| 12 | 9 - Extremely important | 8 | 9 - Extremely important | 9 - Extremely important | 8 | 9 - Extremely important | 9 - Extremely important | 9 - Extremely important |
| 13 | 9 - Extremely important | 9 - Extremely important | 9 - Extremely important | 9 - Extremely important | 9 - Extremely important | 9 - Extremely important | 9 - Extremely important | 9 - Extremely important |
| 14 | 9 - Extremely important | 9 - Extremely important | 9 - Extremely important | 9 - Extremely important | 8 | 9 - Extremely important | 9 - Extremely important | 8 |
| 15 | 8 | 8 | 8 | 7 | 7 | 8 | 7 | 7 |
| 16 | 9 - Extremely important | 9 - Extremely important | 9 - Extremely important |  | 9 - Extremely important | 9 - Extremely important | 9 - Extremely important | 9 - Extremely important |
| Result | **100% important** | **100% important** | **100% important** | **100% important** | **100% important** | **100% important** | **100% important** | **100% important** |
