# Supplementary material
Source: Research Square preprint supplement (doi:10.21203/rs.3.rs-9418759/v1)
Supplement: Supplementary file 4 [file b54c60229a8bc97e28f724b3.docx]

**Supplementary file 2. Focus Group Topic Guides**

**Research Delivery Teams**

1. Can you talk us through how might you approach conversations with Black women regarding opportunities to take part in maternal/neonatal healthcare research?

- How do you ensure cultural sensitivity in these discussions?
- What do you think is most important?
- Anything you avoid?

1. How does the healthcare setting influence recruitment? E.g. if the mother is approached in the community (e.g. own home), primary (e.g., GP surgery), or secondary (e.g., hospital) setting?
2. How important do you think the role of the research delivery team (e.g., nurses and midwives) is in engaging Black women in maternity and neonatal research opportunities?

- Do similarities (e.g. Race, gender, ethnicity, religion) between the women and RDT make a difference?

1. What are some of the key influences and factors that might make a difference to whether Black women and White British women are willing to take part in maternal and neonatal healthcare research?

- What are the reasons for any differences?
- How do these relate to communications between RDTs and the women/birthing partners?

1. In your experience, are there differences in how you would recruit, or the willingness to participate in research, between first-generation (women born outside the UK, but now living in the UK or second-generation women (mother/father born outside the UK, but they were born in the UK)?
2. Have you received any formal or informal training or professional development related to talking to Black women about maternity healthcare, and/or research opportunities?
   - If not, would this have been helpful? Why? Why not?
   - If yes, when? What did the training consist of?
   - Do you think it would be helpful to have guidance? What might this look like?
3. Anything else you’d like to say, anything that you thought you wanted to raise coming in to this focus group that we haven’t covered?

**Black women and representatives of Black women**

1. Have you had any experience taking part in research studies, particularly maternity care but may be other areas of healthcare?
   1. What was that experience like?
   2. How did you get involved?
   3. Who recruited you?
   4. Where were you recruited?
2. Can you tell us what you think would be important when being recruited or taking part in research?
   1. Who and how it is best to approach you (e.g. study team, RDT, usual care provider)? Is there anything to avoid doing?
   2. How does the setting influence the recruitment/engagement? E.g. community (own home), primary (GP surgery), or secondary (hospital).
   3. Would you need to talk to your partner/family/community about participation?
   4. What impact does language have in your willingness to take part in research?
   5. How important is it that the person recruiting or conducting the research is similar to you – i.e. gender, race, ethnicity, age, language etc.
3. What are some of the key influences and factors that might make a difference to whether Black women and White British are willing to take part in maternal and neonatal healthcare research?
4. What are the reasons for any differences?
5. To what extent does the issue of trust make a difference to the likelihood of Black women considering taking part in research? How do you think this compares to women from other ethnic groups and why?
6. Have you encountered instances of cultural insensitivity or bias within the healthcare system when talking about research?
   1. Can you tell us about this/give some examples?
   2. How did it make you feel?
7. How have you addressed or responded to these situations?
8. What was the outcome?
9. What do you think RDTs need to be most aware of to guide their discussions with Black women/birthing partners when talking about maternity and neonatal healthcare research? Why?
10. Would you like to add anything that we haven’t already covered?
